# Supplementary material for: A heterostructured electrocatalyst for the electrochemical valorization of 5-hydroxymethylfurfural coupled with the hydrogen evolution reaction
Source: Royal Society of Chemistry journal article supplement (doi:10.1039/d3ta05349k), 2023-01-01
Supplement: d3ta05349k1.pdf [file d3ta05349k1.pdf]

**Electronic Supplementary Information (ESI)**

**Heterostructured Electrocatalyst for the Electrocatalytic Valorization of 5-Hydroxymethylfurfural Coupled with Hydrogen Evolution Reaction**

Loknath Thapa<sup>a#</sup>, Asim Bhaumik<sup>b</sup>, Swastik Mondal<sup>c,d</sup>, and C. Retna Raja<sup>a\*</sup>

<sup>a</sup> *Functional Materials and Electrochemistry Lab, Department of Chemistry  
IIT Kharagpur, Kharagpur-721302, West Bengal, India*

E-mail: [crraj@chem.iitkgp.ac.in](mailto:crraj@chem.iitkgp.ac.in)

<sup>#</sup>Main contributor

<sup>b</sup> *School of Material Sciences, Indian Association for the Cultivation of Science,  
Kolkata 700032, West Bengal, India*

<sup>c</sup> *CSIR–Central Glass and Ceramic Research Institute, 196 Raja S C Mullick Road, 700 032,  
Kolkata, India*

<sup>d</sup> *Academy of Scientific and Innovative Research (AcSIR), Ghaziabad–201002, India*

### **Synthesis of Ni<sub>9</sub>S<sub>8</sub>**

Ni<sub>9</sub>S<sub>8</sub> was synthesized by annealing the mixture of NiCl<sub>2</sub>·6H<sub>2</sub>O (100 mg), C<sub>3</sub>N<sub>6</sub>H<sub>6</sub> (250 mg), and CH<sub>4</sub>N<sub>2</sub>S (250 mg) at the identical condition used for the synthesis of the ternary heterostructure (750 °C for 1 h under Ar atmosphere).

### **Synthesis of MoS<sub>2</sub>**

MoS<sub>2</sub> was synthesized by annealing Na<sub>2</sub>MoO<sub>4</sub>·2H<sub>2</sub>O (100 mg) in presence of CH<sub>4</sub>N<sub>2</sub>S (250 mg) at the identical condition used for the synthesis of the ternary heterostructure.

### **Synthesis of MoC**

MoC was synthesized by annealing the mixture of Na<sub>2</sub>MoO<sub>4</sub>·2H<sub>2</sub>O (100 mg) and C<sub>3</sub>N<sub>6</sub>H<sub>6</sub> (250 mg) at the identical condition used for the synthesis of the ternary heterostructure.

### **Synthesis of FeP@NPC**

It was synthesized according to procedure established in our lab using [Fe(bpy)<sub>3</sub>](PF<sub>6</sub>)<sub>2</sub> and melamine.<sup>1</sup>

**Fig. S1** HPLC profile of HMF and FDCA and the corresponding calibration plots.

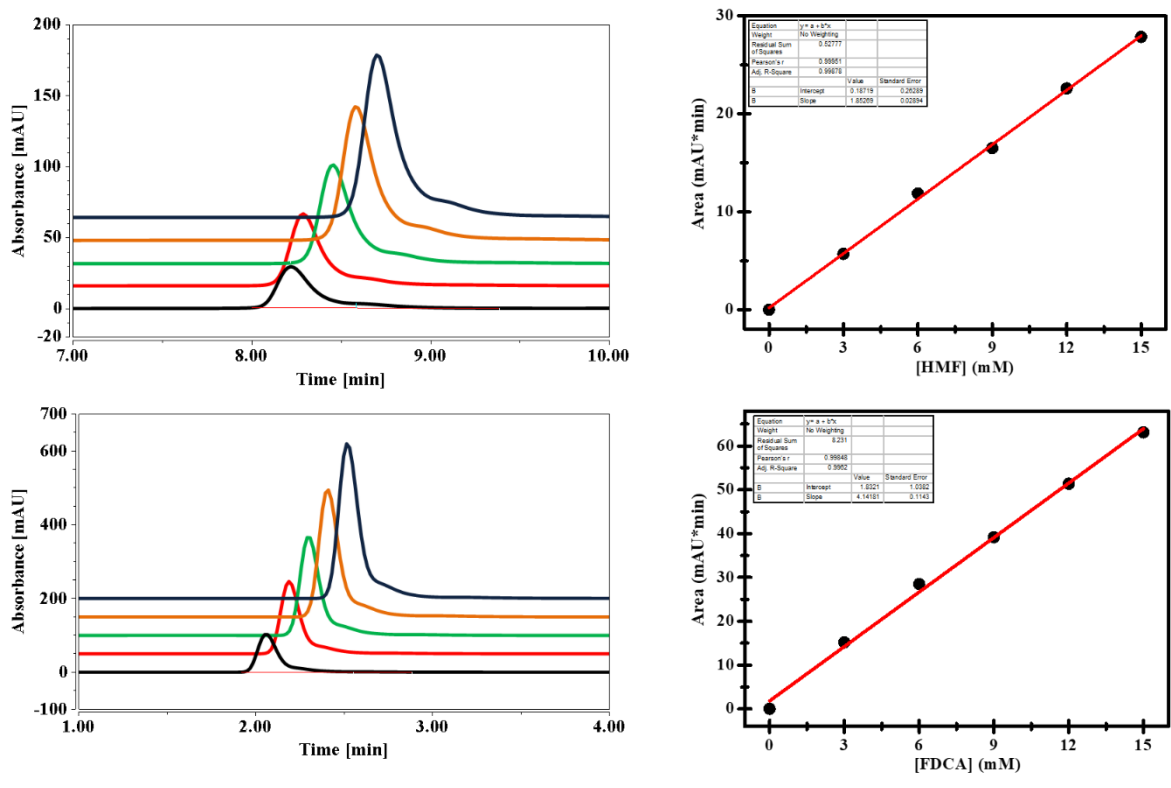

**Fig. S2** HPLC profile of HMFCa and FFCA and the corresponding calibration plots.

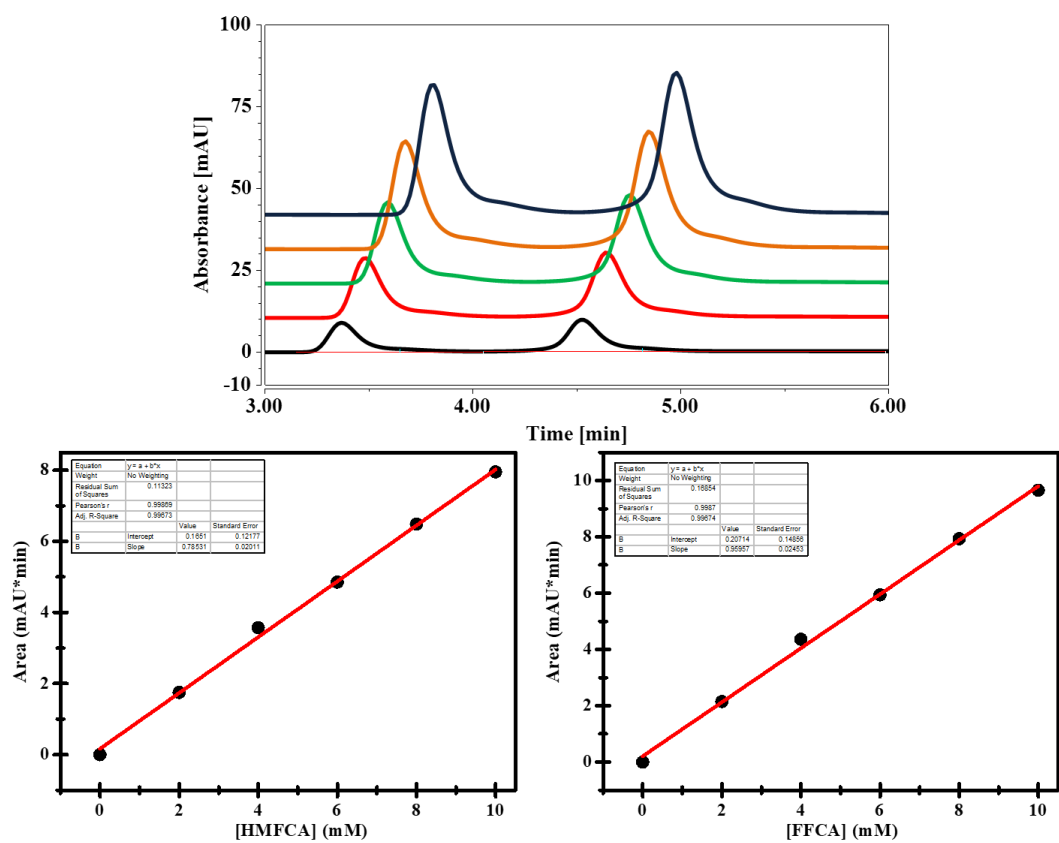

**Fig. S3** XRD profile of the ternary heterostructure. Le Bail refinements (GOF = 1.23,  $R_p = 2.56$ ,  $wR_p = 3.24$ ) confirms the presence of  $\text{MoS}_2$ ,  $\text{MoC}$ ,  $\text{Ni}_9\text{S}_8$  and  $\text{Ni}_3\text{S}_2$  phases.

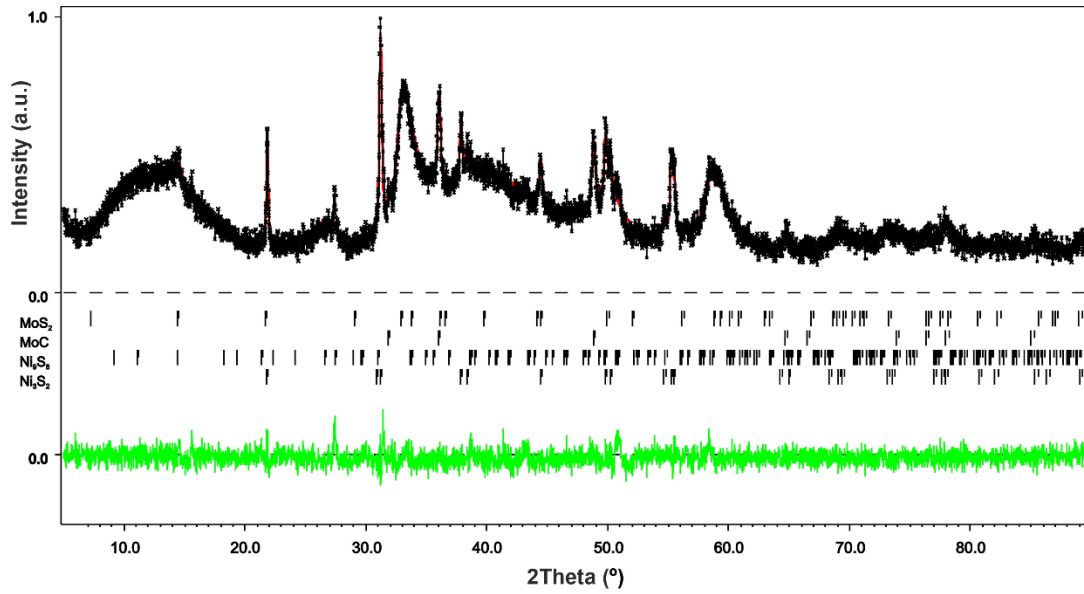

**Fig. S4** FESEM images of NiMoO<sub>4</sub> nanowire bundle at different magnification.

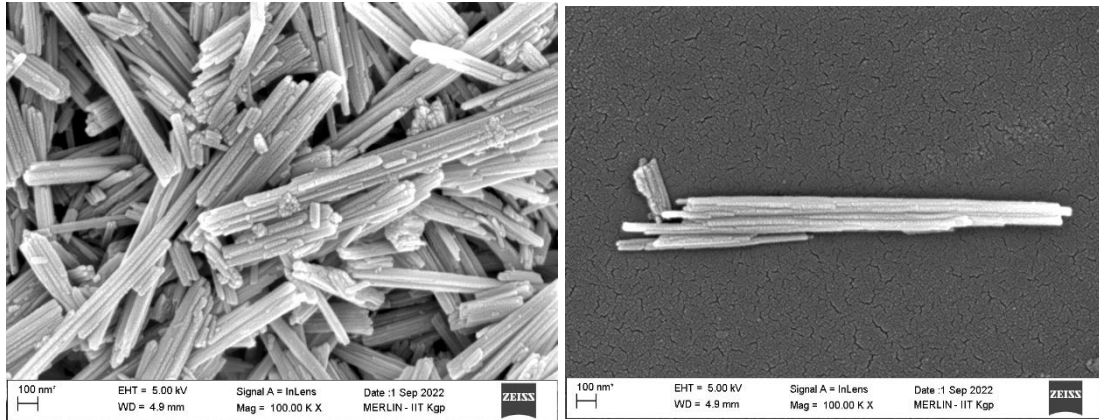

**Fig. S5** (a) XRD profile, (b) FESEM image, and (c) EDX elemental mapping images of Ni<sub>9</sub>S<sub>8</sub>.

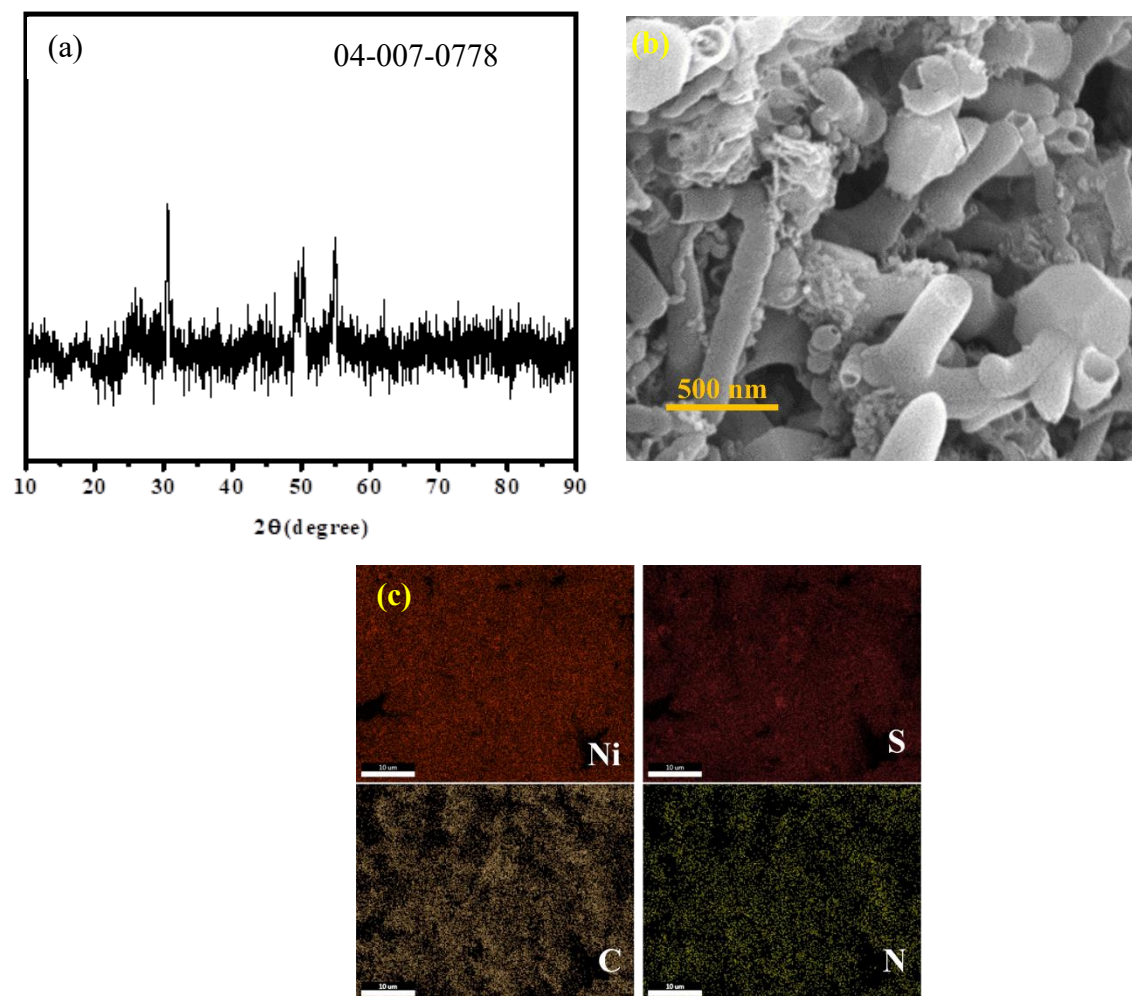

**Fig. S6** (a) XRD profile, (b) FESEM image, and (c) EDX elemental mapping images of MoS<sub>2</sub>.

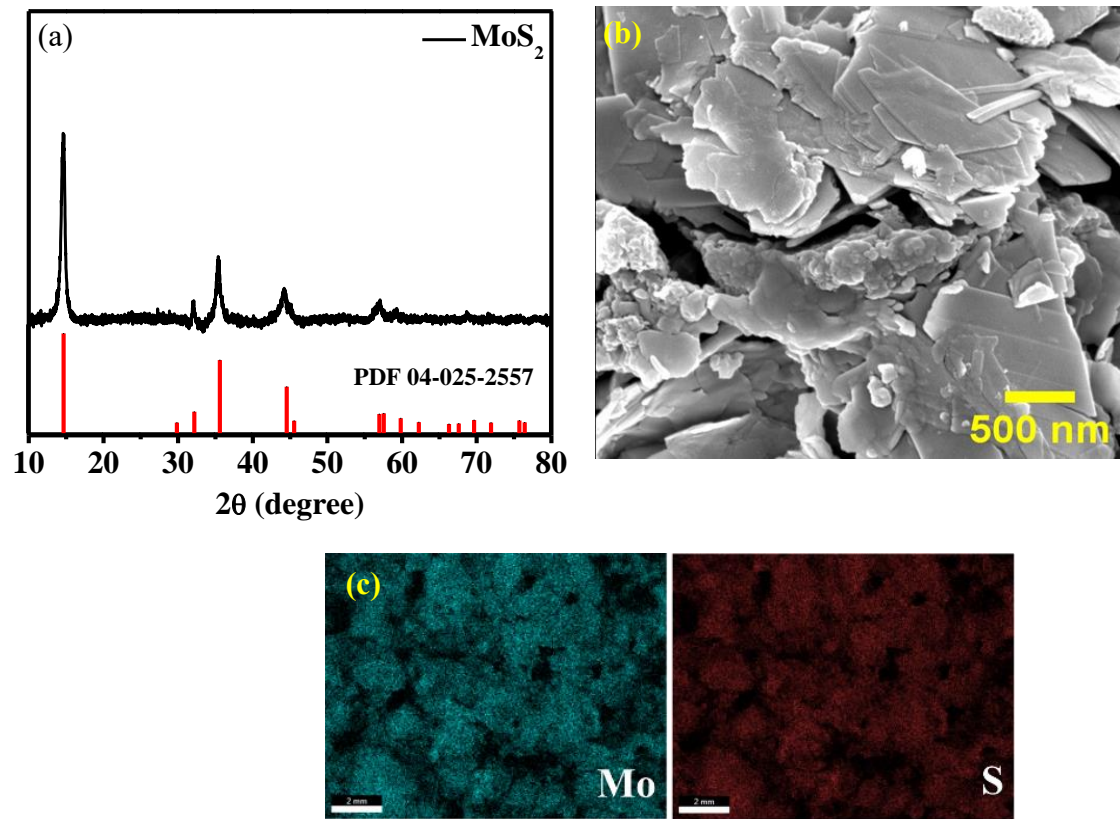



**Fig. S7** (a) XRD profile, (b) FESEM image, and (c) EDX elemental mapping images of MoC.

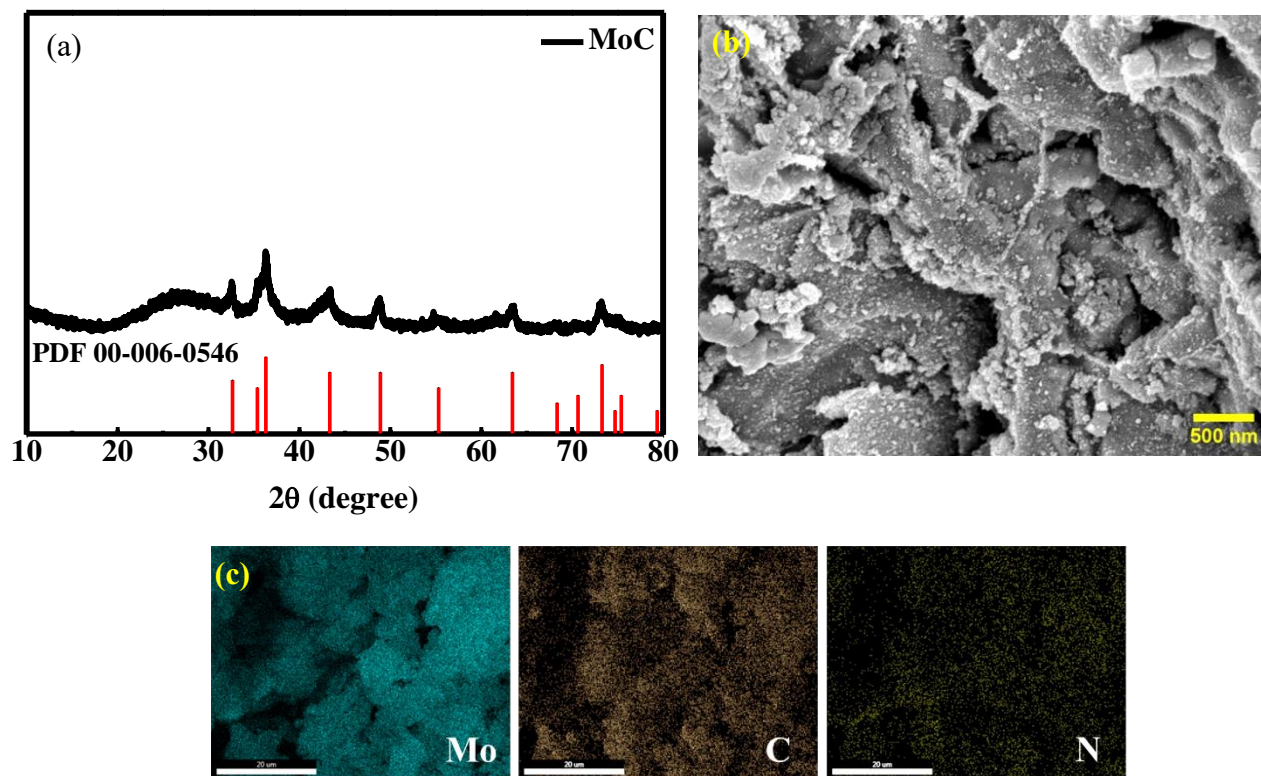

**Fig. S8** TEM image depicting the presence of defects in MoS<sub>2</sub> sheets of Ni<sub>x</sub>S<sub>y</sub>/MoS<sub>2</sub>/MoC heterostructure. Low (a) and high resolution (b) images along with the inverse FFT images (1 to 3) are shown.

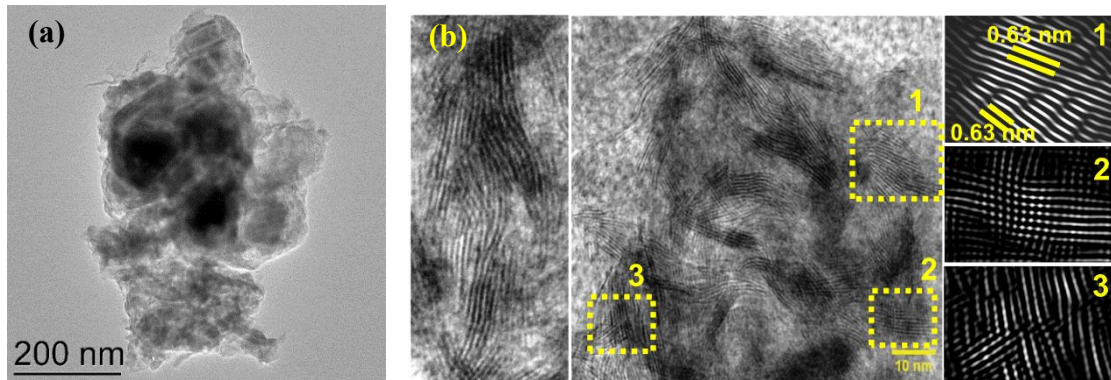

**Fig. S9** (a) XPS survey scan, (b) N 1s spectra of  $\text{Ni}_x\text{S}_y/\text{MoS}_2/\text{MoC}$  heterostructure.

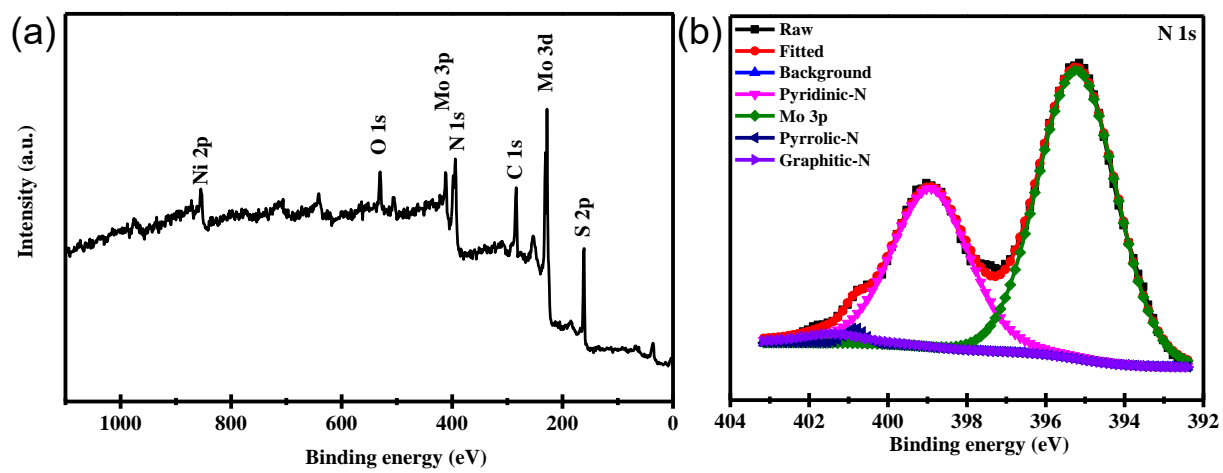

**Fig. S10** N<sub>2</sub> adsorption/desorption isotherm of Ni<sub>x</sub>S<sub>y</sub>/MoS<sub>2</sub>/MoC heterostructure.

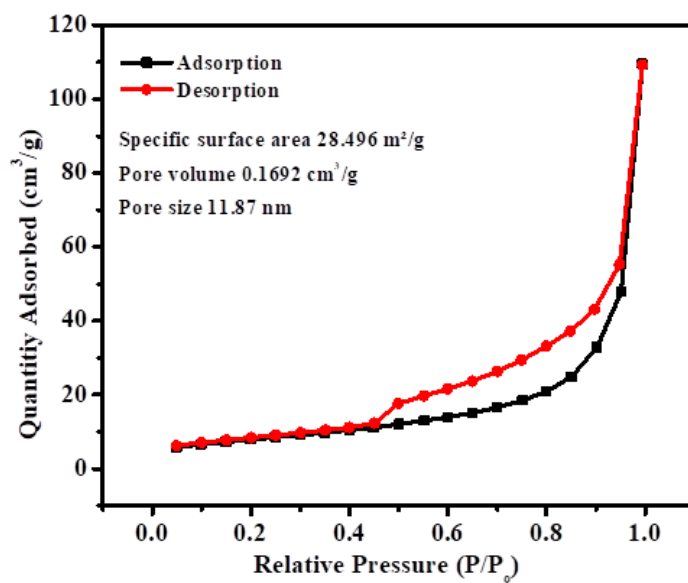

**Fig. S11** Cyclic voltammetric profile of (a)  $\text{Ni}_x\text{S}_y/\text{MoS}_2/\text{MoC}$  heterostructure and (b)  $\text{Ni}_9\text{S}_8$  and the corresponding  $C_{dl}$  plot (c).

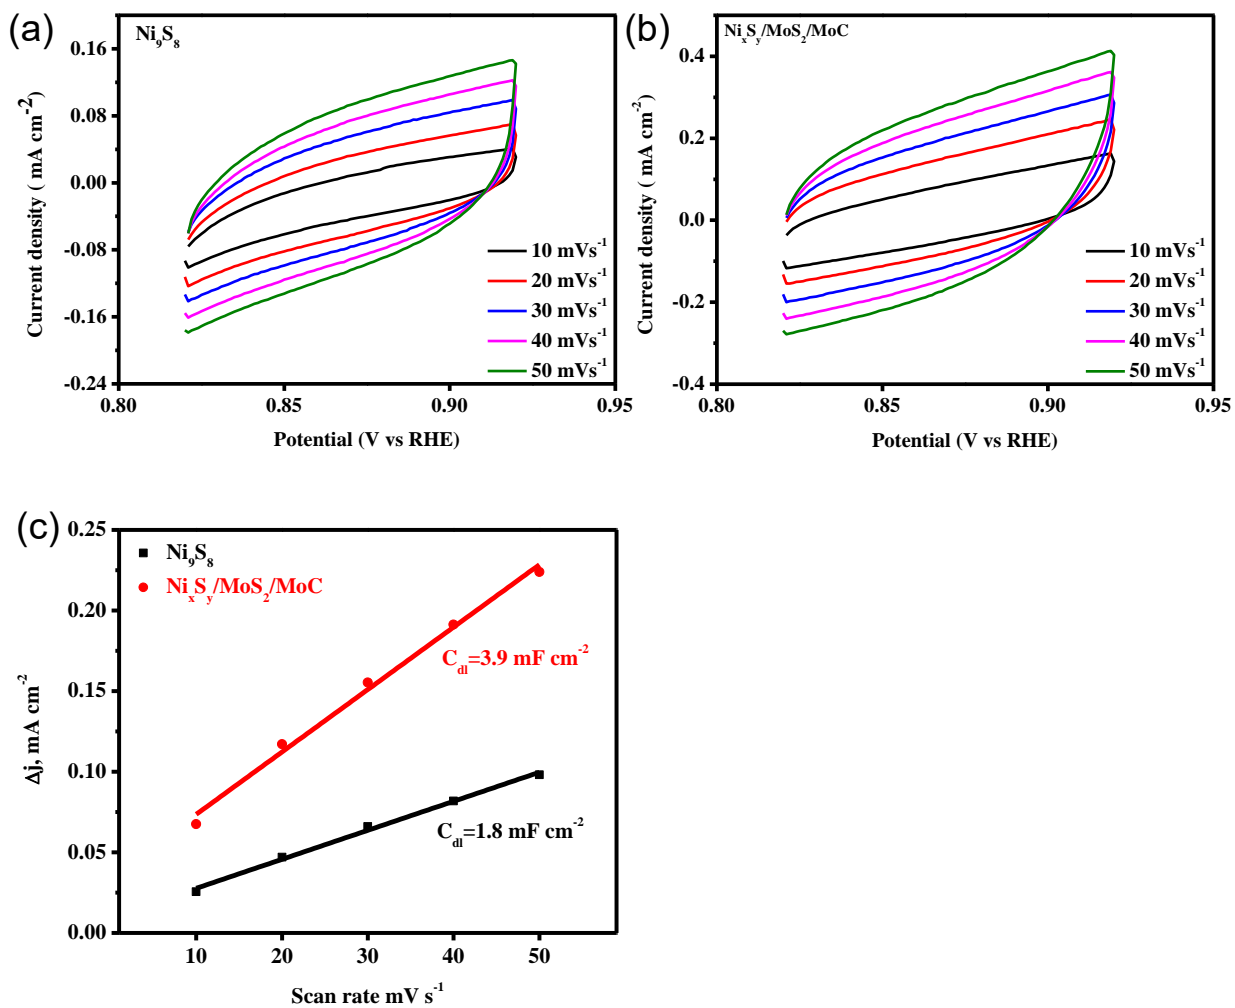

**Fig. S12** Schematic illustration of the electrochemical cell used for HMF oxidation.

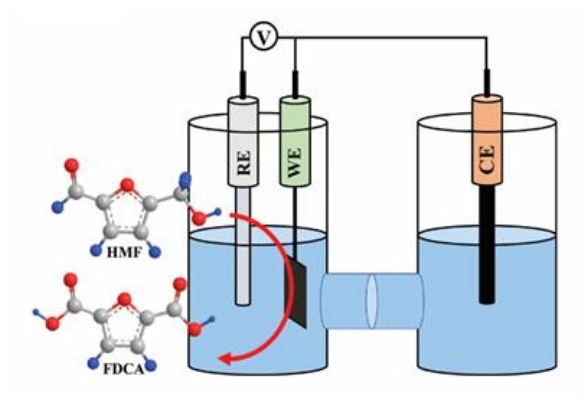

**Fig. S13** Charge associated with the  $\text{Ni}^{2+} \rightarrow \text{Ni}^{3+}$  redox reaction of (a)  $\text{Ni}_x\text{S}_y/\text{MoS}_2/\text{MoC}$  heterostructure, (b)  $\text{Ni}_9\text{S}_8$ , (c)  $\text{MoS}_2/\text{Ni}_9\text{S}_8$ , and (d)  $\text{MoC}/\text{Ni}_9\text{S}_8$ . Charge was calculated by integrating the area under the background subtracted LSV. Sweep rate: 5 mV/s

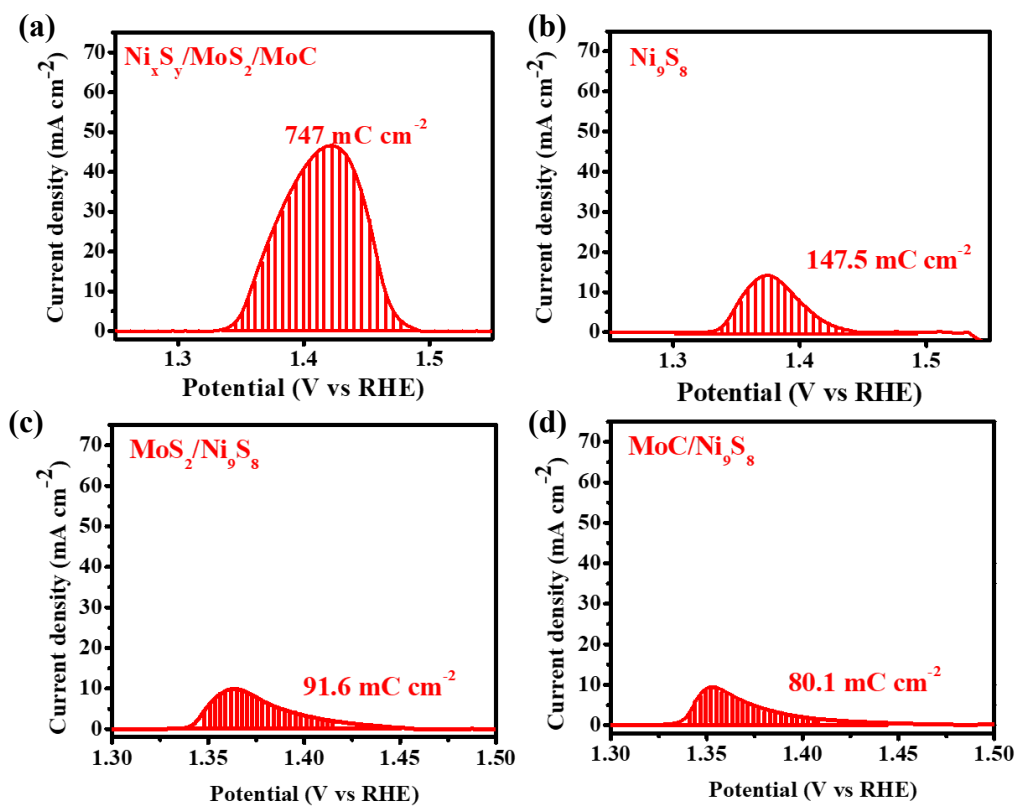

**Fig. S14** (a) LSV of Ni<sub>x</sub>S<sub>y</sub>/MoS<sub>2</sub>/MoC in presence of 10 mM HMF with and without iR correction. Sweep rate: 5 mV/s

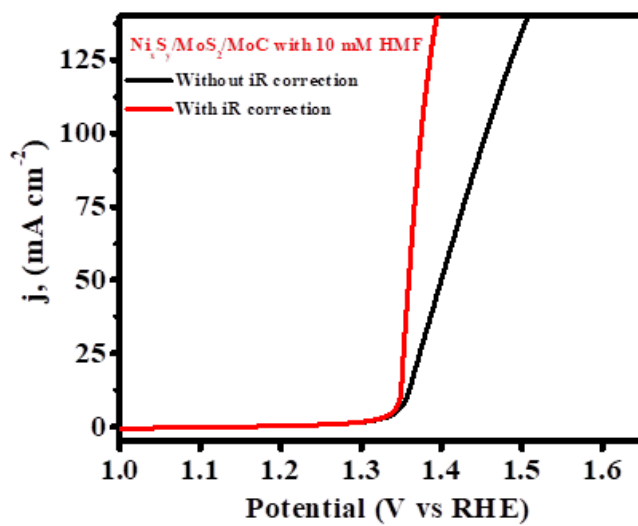



**Fig. S15** LSV illustrating the activity of Ni<sub>9</sub>S<sub>8</sub> towards HMF oxidation. Sweep rate: 5 mV/s

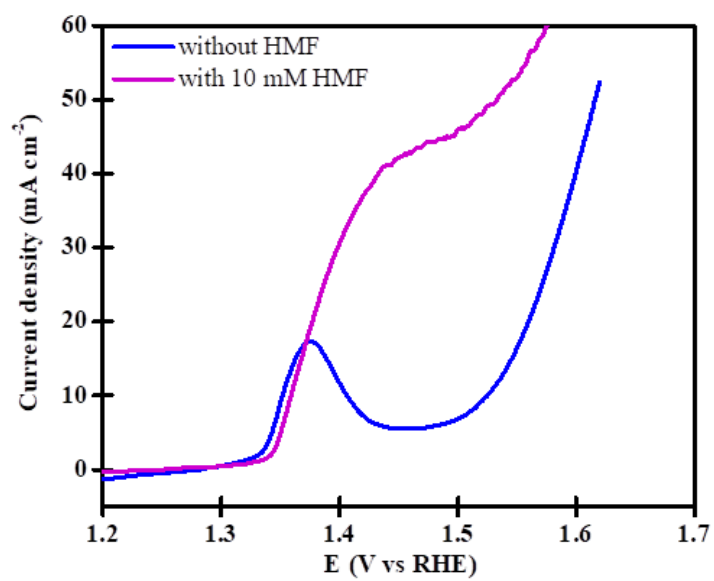

**Fig. S16** LSV illustrating the catalytic activity of (a) MoC, (b) MoS<sub>2</sub>, and binary (c) MoS<sub>2</sub>/Ni<sub>9</sub>S<sub>8</sub>, and (d) MoC/Ni<sub>9</sub>S<sub>8</sub> catalysts towards HMF oxidation. Sweep rate: 5 mV s<sup>-1</sup>

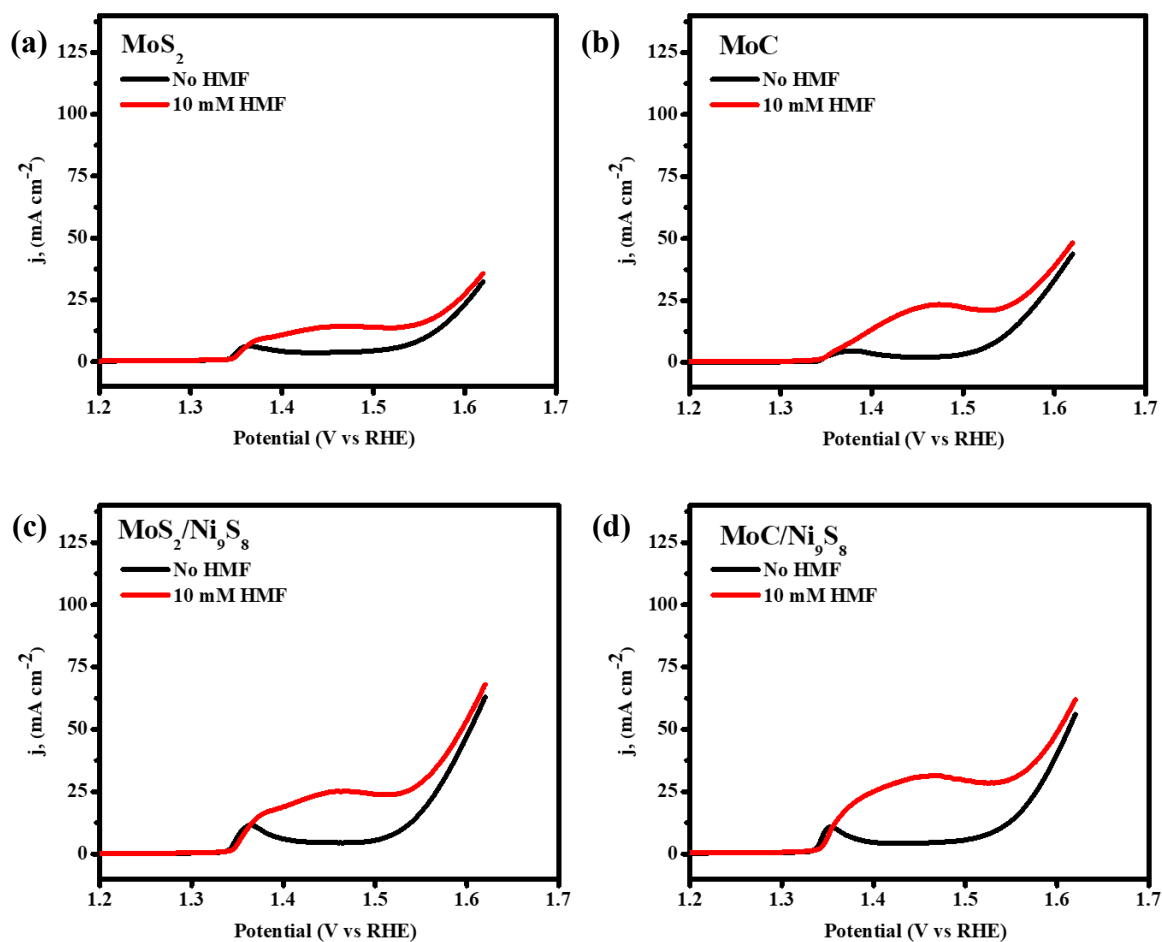

**Fig. S17** Tafel plot of (a)  $\text{Ni}_x\text{S}_y/\text{MoS}_2/\text{MoC}$  heterostructure and (b)  $\text{Ni}_9\text{S}_8$ .

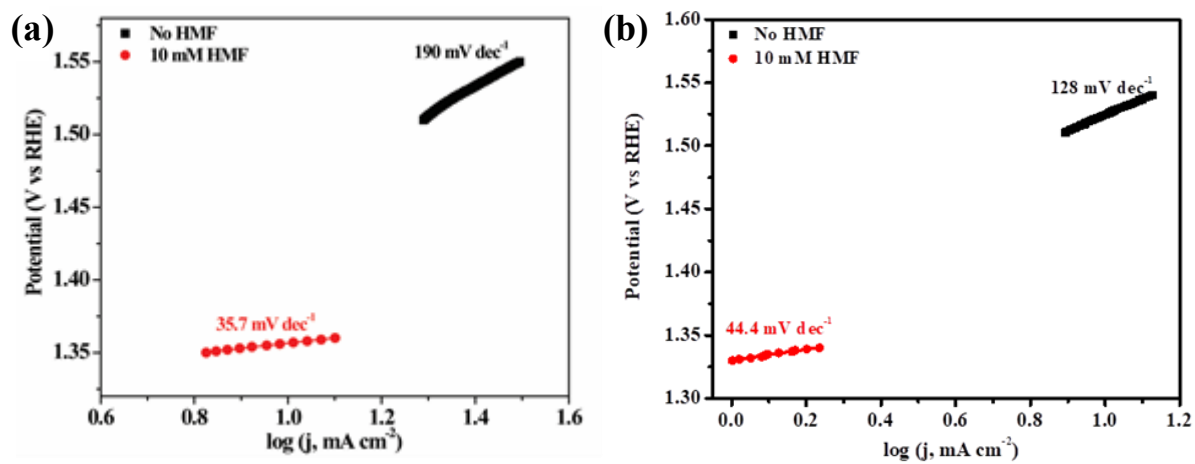

**Fig. S18**  $^1\text{H-NMR}$  of FDCA obtained from the anodic compartment (after acidification) (Inset photograph). Signals **a** and **b** are from the NMR solvent (methanol).

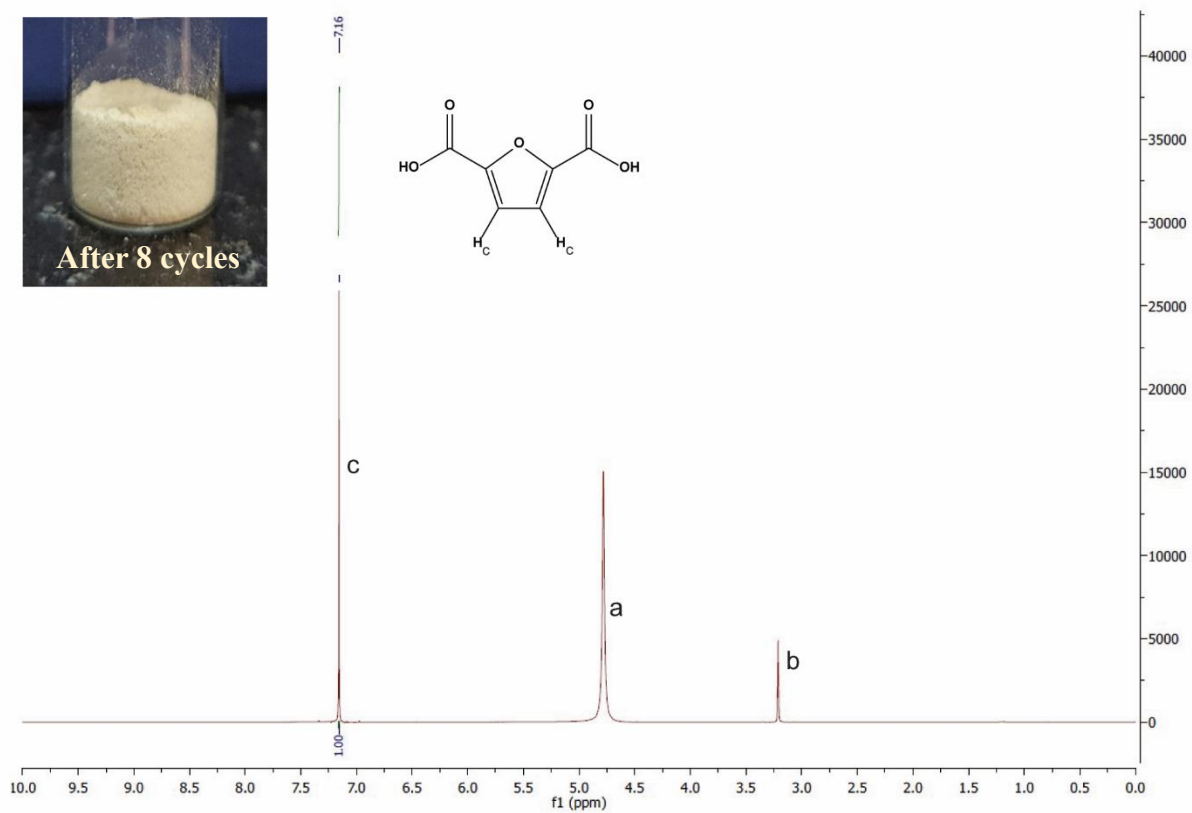

**Fig. S19** (a, c) Current-time and charge-time transients obtained during constant potential electrolysis at 1.45 and 1.5 V, (b, e) HPLC profile, and (c, f) concentration vs charge plot for HMF, FDCA and the corresponding intermediates. These experiments were performed with electrode area of 1 cm<sup>2</sup> to avoid the current overflow.

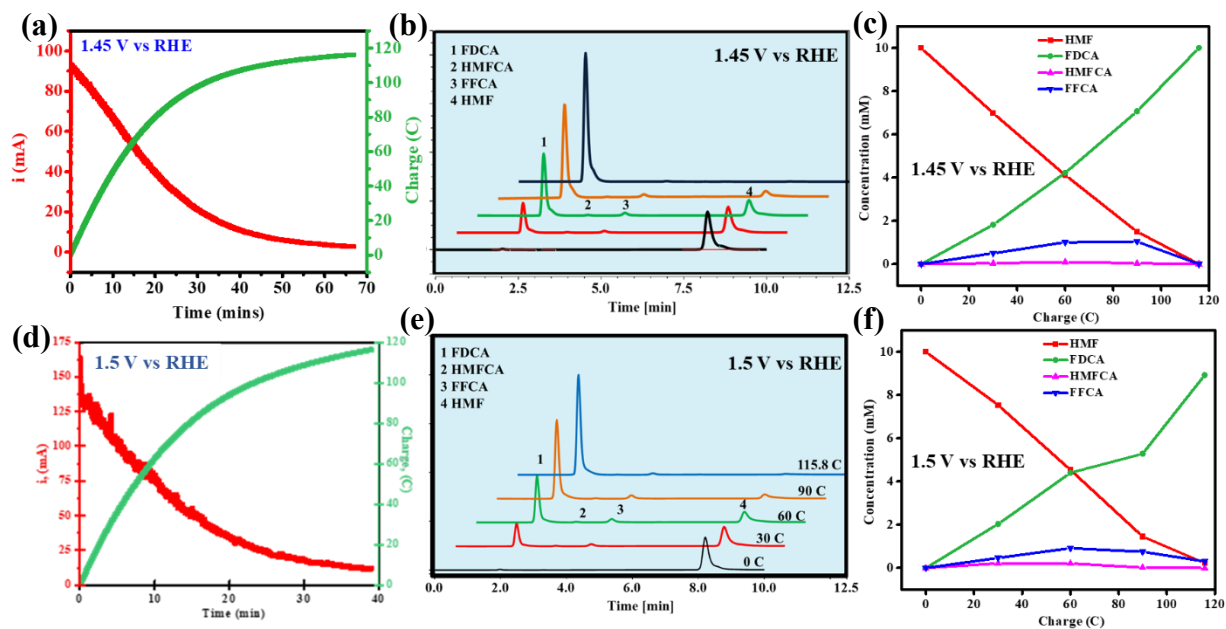

**Fig. S20** (a-c) Current- and charge-time transients obtained during constant potential electrolysis at different potentials, (d-f) HPLC profile, and (g-i) concentration vs charge plot of HMF, FDCA and the corresponding intermediates at different charge passed interval during the electrolysis using Ni<sub>9</sub>S<sub>8</sub> catalyst.

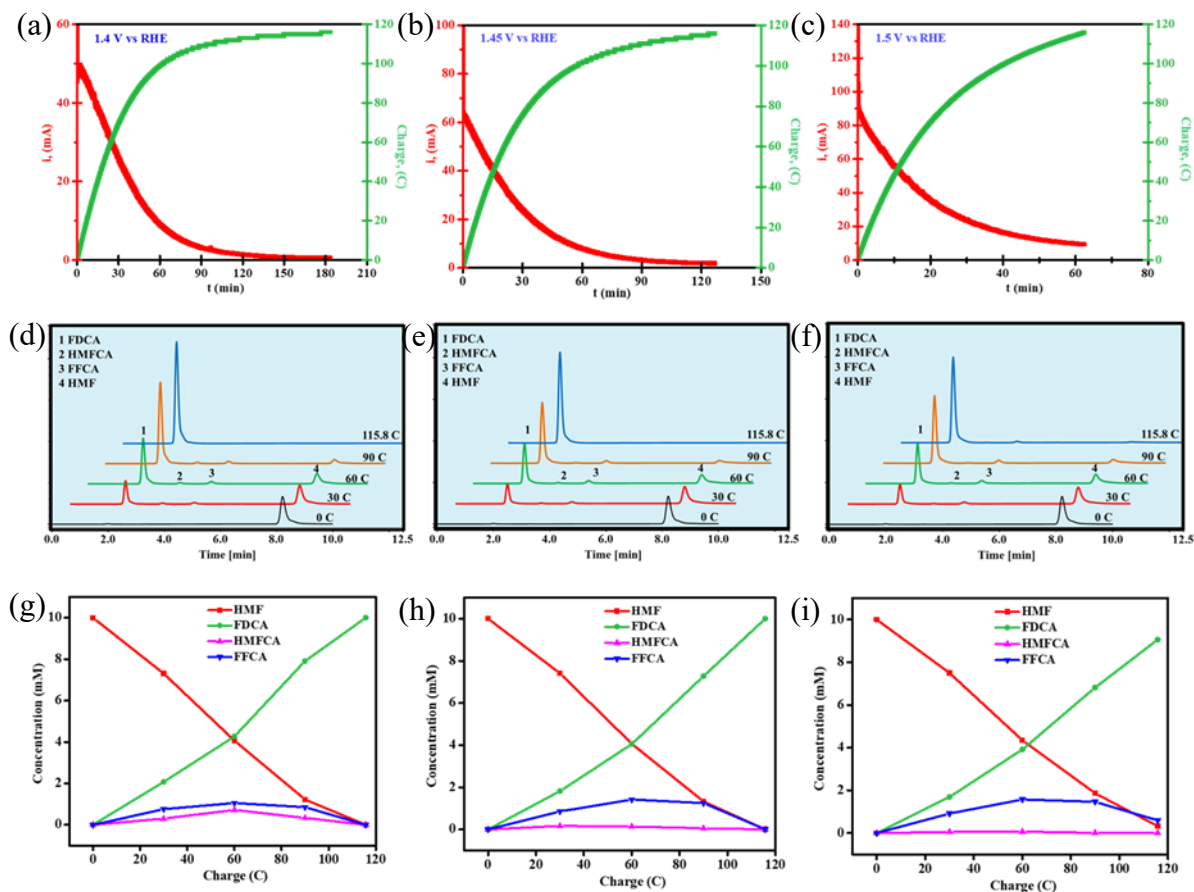

**Fig. S21** (a) *i* - *t* plot illustrating the stability of Ni<sub>x</sub>S<sub>y</sub>/MoS<sub>2</sub>/MoC after consecutive addition of HMF (10 mM). (b) LSV obtained before and after 8 consecutive cycles towards HMF oxidation. Sweep rate: 5 mV/s

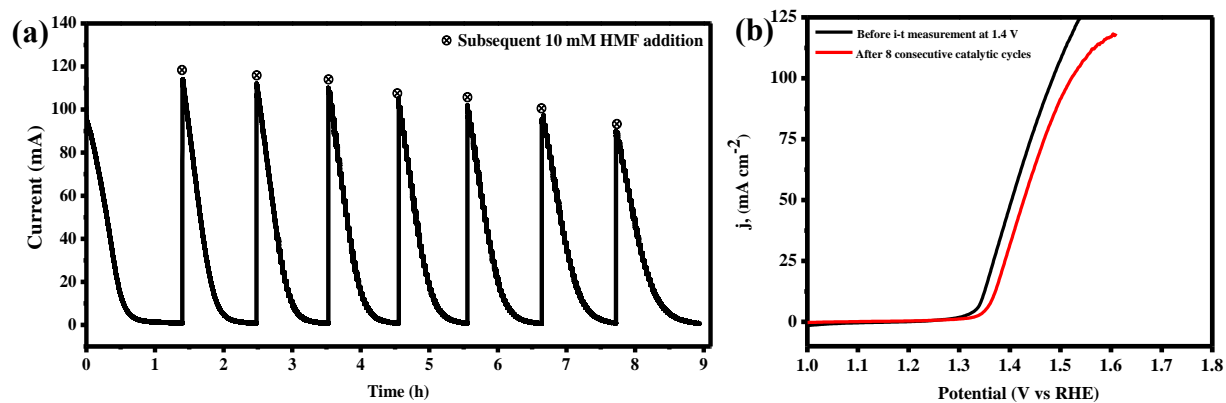

**Fig. S22** Post-consecutive HMFOR (a) XRD, (b-c) FESEM image and EDX mapping image, and (d) TEM image of  $\text{Ni}_x\text{S}_y/\text{MoS}_2/\text{MoC}$ .

EDX spectra of  $\text{Ni}_x\text{S}_y/\text{MoS}_2/\text{MoC}$  (e) before and (f) after consecutive catalytic cycles.

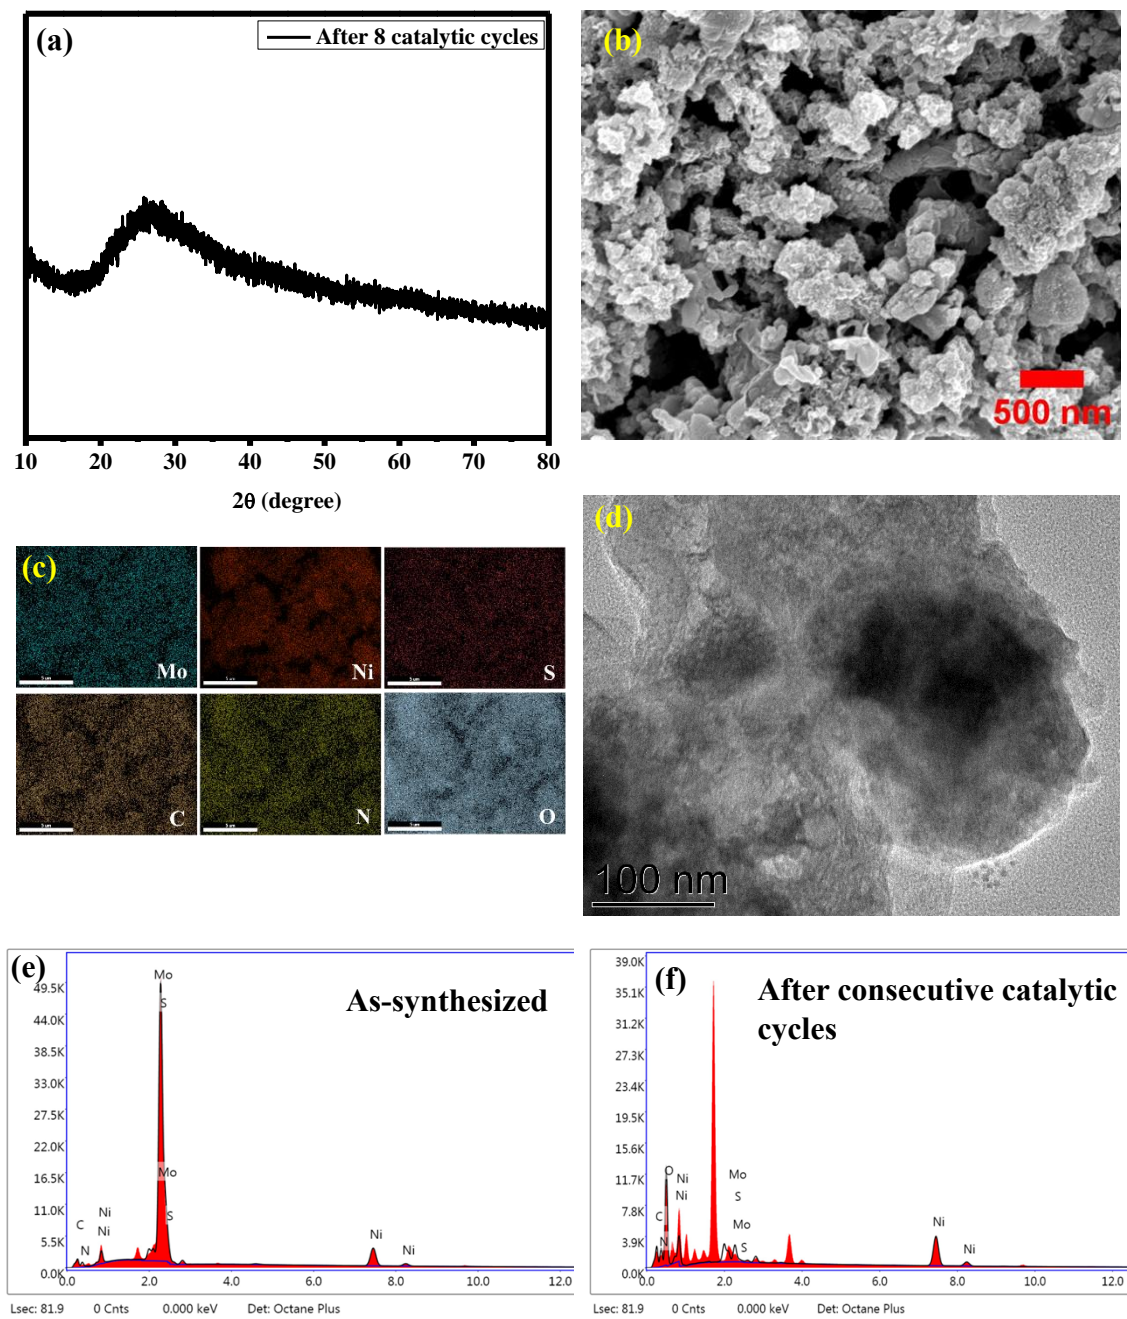



**Fig. S23** XPS survey scan profile of Ni<sub>x</sub>S<sub>y</sub>/MoS<sub>2</sub>/MoC after HMFOR.

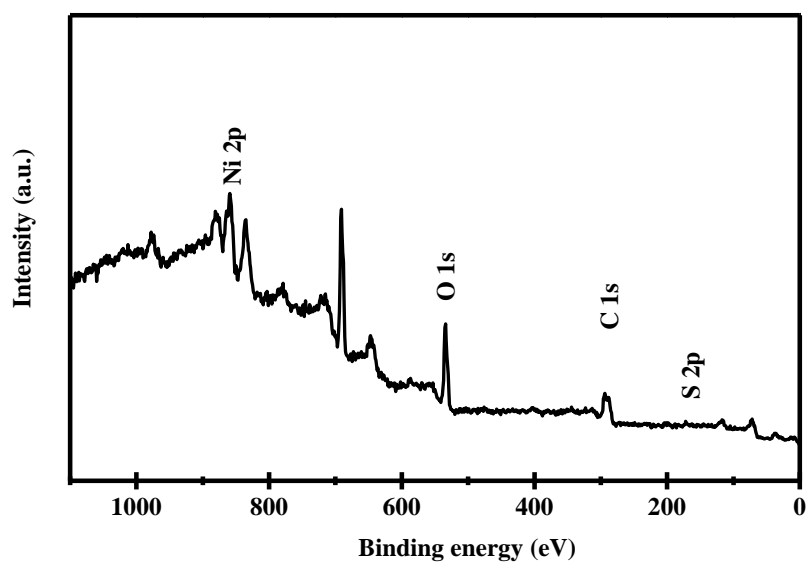

**Table S1** Table summarizing the atomic % of Ni, Mo, O and S in Ni<sub>x</sub>S<sub>y</sub>/MoS<sub>2</sub>/MoC post catalysis.

| Ni 2p3 | Mo 3d | O 1s  | S 2p  |                |
|--------|-------|-------|-------|----------------|
| 8.43   | 13.13 | 13.54 | 23.74 | As-synthesized |
| 31.83  | 0.30  | 41.04 | 0     | Post HMFOR     |

**Fig. S24** Photograph showing full cell setup and the collection of electrochemically generated  $H_2$  by water drainage method at 1.6 V.

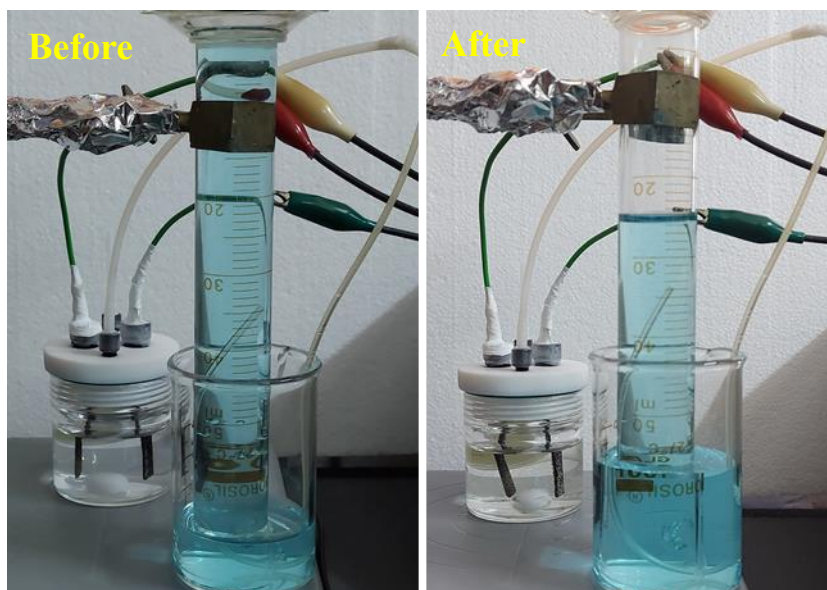

**Table S2**

| Catalyst                                               | Potential (RHE) | [HMF] (mM) | Amount of HMF (mmol) | Time (h)    | Area (cm <sup>2</sup> ) | FE (%)      | Rate of FDCA production (mmol <sub>FDCA</sub> /mmol <sub>HMF</sub> /h/cm) | Ref.             |
|--------------------------------------------------------|-----------------|------------|----------------------|-------------|-------------------------|-------------|---------------------------------------------------------------------------|------------------|
| <b>Ni<sub>x</sub>S<sub>y</sub>/MoS<sub>2</sub>/MoC</b> | <b>1.4 V</b>    | <b>10</b>  | <b>0.2</b>           | <b>1.08</b> | <b>2</b>                | <b>~100</b> | <b>0.463</b>                                                              | <b>This work</b> |
| Ni <sub>0.2</sub> Mo <sub>0.8</sub> N                  | 1.423 V         | 10         | 0.45                 | ~4.5        | --                      | 99.3        | --                                                                        | 2                |
| Ni <sub>3</sub> Fe/V <sub>o</sub> -NiOOH               | 1.55 V          | 50         | 0.15                 | 6           | 2                       | ~100        | 0.083                                                                     | 3                |
| CuH_NWs@Ce:                                            | 1.45 V          | 10         | 0.3                  | 2           | 3                       | 98          | 0.49                                                                      | 4                |
| NiH_NS                                                 |                 |            |                      |             |                         |             |                                                                           |                  |
| NiCoFeS-MOF                                            | 1.39 V          | 50         | 0.5                  | ~2          | 1                       | 99          | 0.509                                                                     | 5                |
| CF-Ni MOF/Ag                                           | 1.623 V         | 10         | 0.4                  | 2.5         | --                      | 98.6        | --                                                                        | 6                |
| NiMo <sub>3</sub> S <sub>4</sub>                       | 1.414 V         | 10         | 0.2                  | 2           | --                      | 98.4        | --                                                                        | 7                |
| Mn <sub>0.2</sub> NiS                                  | 1.48 V          | 100        | 1                    | 20 mins     | 1                       | 94.2        | 2.854                                                                     | 8                |
| NiS <sub>x</sub> /β-Ni(OH) <sub>2</sub>                | 1.413 V         | 10         | 0.1                  | 3.05        | 1                       | 98.3        | 0.32                                                                      | 9                |
| NiOOH-Cu(OH) <sub>2</sub>                              | 1.4 V           | 5          | 0.075                | 5.2         | 2                       | 93.8        | 0.036                                                                     | 10               |
| Ni <sub>0.5</sub> Co <sub>2.5</sub> O <sub>4</sub>     | 1.5 V           | 10         | 0.1                  | 2.78        | 0.2                     | 90.3        | 1.67                                                                      | 11               |
| NiFe LDH                                               | 1.48 V          | 10         | 0.1                  | ~3.25       | --                      | 84.4        | --                                                                        | 12               |
| Co <sub>9</sub> S <sub>8</sub> -                       | 1.4 V           | 10         | 0.2                  | 2.78        | 1                       | 98.6        | 0.356                                                                     | 13               |
| Ni <sub>3</sub> S <sub>2</sub> @NSOC                   |                 |            |                      |             |                         |             |                                                                           |                  |
| CoP/Ni <sub>2</sub> P/NiCoP @NC                        | 1.45 V          | 5          | 0.1                  | 5.5         | 1                       | 97.6        | 0.177                                                                     | 14               |
| NiCo <sub>2</sub> O <sub>4</sub>                       | 1.45 V          | 10         | 0.33                 | ~2.17       | 3                       | 99          | 0.152                                                                     | 15               |
| NiCu NTs                                               | 1.424 V         | 20         | 0.8                  | 2           | --                      | 99          | --                                                                        | 16               |

|                                                        |         |    |      |      |      |      |       |    |
|--------------------------------------------------------|---------|----|------|------|------|------|-------|----|
| NiVCo-LDHs                                             | 1.376 V | 10 | 0.1  | 1.83 | 3    | 97.8 | 0.534 | 17 |
| Ni <sub>x</sub> Se <sub>y</sub> -NiFe                  | 1.423 V | 10 | 0.3  | 1.42 | 1    | 98.9 | 0.545 | 18 |
| LDH@NF                                                 |         |    |      |      |      |      |       |    |
| Ni, Co, Cu NPs                                         | 1.47 V  | 10 | 0.1  | 18   | 2.25 | 94.1 | 0.023 | 19 |
| NiO by Co                                              | 1.47 V  | 10 | 0.15 | 4    | 1    | 94.6 | 0.237 | 20 |
| doping                                                 |         |    |      |      |      |      |       |    |
| [Ru/Ni(OH) <sub>2</sub> ]                              | 1.45 V  | 5  | 0.05 | 0.5  | 3    | 98.5 | 0.65  | 21 |
| Ni <sub>3</sub> S <sub>2</sub> -MoS <sub>2</sub>       | 1.45 V  | 20 | 0.6  | 2.5  | --   | ~100 | --    | 22 |
| S-Ni@C-600                                             | 1.437 V | 10 | 0.15 | 4.5  | 0.5  | 96   | 0.427 | 23 |
| Ni <sub>0.9</sub> -Cu <sub>0.1</sub> (OH) <sub>2</sub> | 1.45 V  | 5  | 0.2  | 2    | 2    | 91.2 | 0.24  | 24 |
| NiS <sub>x</sub> /Ni <sub>2</sub> P                    | 1.46 V  | 10 | 0.15 | 3    | 1.7  | 95.1 | 0.193 | 25 |

# Unit for rate of FDCA formation is h<sup>-1</sup> cm<sup>-2</sup>, however it is reported as

mmol<sub>FDCA</sub>/mmol<sub>HMF</sub> h<sup>-1</sup> cm<sup>-2</sup> for comparison purpose.

--Electrode area not available.

## References

- (1) M. Manikanta Kumar and C. R. Raj, *ACS Appl. Mater. Interfaces*, 2022, **14**, 15176–15186
- (2) M. Sun, J. Yang, J. Huang, Y. Wang, X. Liu, Y. Qi, and L. Zhang, *Langmuir* 2023, **39**, 3762–3769.
- (3) J. Liu, and S. Tao, *Adv. Sci.*, 2023, 2302641.
- (4) G. Ren, B. Liu, L. Liu, M. Hu, J. Zhu, X. Xu, P. Jing, J. Wu, and J Zhang, *Inorg. Chem.* 2023, **62**, 12534–12547.
- (5) Y. Feng, K. Yang, R. L. Smith, Jr, and X. Qi, *J. Mater. Chem. A*, 2023,**11**, 6375-6383.
- (6) X. Pang, H. Zhao, Y. Huang, B. Luo, H. Bai, and W. Fan, *Appl. Surf. Sci.*, 2023, **608**, 155152
- (7) T. Wu, Z. Xu, X. Wang, M. Luo, Y. Xia, X. Zhang, J. Li, J. Liu, J. Wang, H-. Li. Wang, and F. Huang, *Appl. Catal. B*, 2023, **323**, 122126
- (8) S. Li, S. Wang, Y. Wang, J. He, K. Li, Y. Xu, M. Wang, S. Zhao, X. Li, and X. Zhong, *Adv. Funct. Mater.*, 2023, **33**, 2214488.
- (9) C. Liu, X-. R. Shi, K. Yue, P. Wang, K. Zhan, X. Wang, B. Y. Xia, and Y. Yan, *Adv. Mater.* 2023, **35**, 2211177.
- (10) J. Woo, B. C. Moon, U. Lee, H-. S. Oh, K. H. Chae, Y. Jun, B. K. Min, and D. K. Jee, *ACS Catal.* 2022, **12**, 4078–4091.
- (11) Y. Lu, T. Liu, Y-. C. H, L, Zhou, Y. Li, W. Chen, L. Yang, B. Zhou, Y. Wu, Z. Kong, Z. Huang, Y. Li, C-. Li. Dong, S. Wang, and Y. Zou, *ACS Catal.*, 2022, **12**, 4242–4251.
- (12) Y-. F. Qi, K-. Y. Wang, Y. Sun, J. Wang, and C. Wang, *ACS Sustainable Chem. Eng.* 2022, **10**, 645–654.
- (13) Y. Zhang, Z. Xue, X. Zhao, B. Zhang, and T. Mu, *Green Chem.*, 2022, **24**, 1721-1731.
- (14) M. Zhou, J. Chen, and Y. Li, *Catal. Sci. Technol.*, 2022,**12**, 4288-4297.
- (15) Z. Zhou, Y. Xie, L. Sun, Z. Wang, W. Wang, L. Jiang, X. Tao, L. Li, X-. H. Li, and G. Zhao, *Appl. Catal. B*, 2022, **305**, 121072.
- (16) L. Zheng, Y. Zhao, P. Xu, Z. Lv, X. Shi, and H. Zheng, *J. Mater. Chem. A*, 2022,**10**, 10181-10191.
- (17) L. Gao, X. Wen, S. Liu, D. Qu, Y. Ma, J. Feng, Z. Zhong, H. Guan, and L. Niu, *J. Mater. Chem. A*, 2022, **10**, 21135-21141.
- (18) Y. Zhong, R-. Q. Ren, J-. B. Wang, Y-. Y. Peng, Q. Li, and Y-, M. Fan, *Catal. Sci. Technol.*, 2022, **12**, 201-211.
- (19) Y. Zhou, Y. Shen, and H. Li, *Appl. Catal. B*, 2022, **317**, 121776.

- (20) Y. Yang, D. Xu, B. Zhang, Z. Xue, and T. Mu, *Chem. Eng. J.*, 2022, **433**, 133842.
- (21) X. Chai, K. Jiang, J. Wang, Z. Ren, X. Liu, L. Chen, X. Zhuang, and T. Wang, *ChemSusChem.*, 2022, **15**, e202200863.
- (22) S. Yang, Y. Guo, Y. Zhao, L. Zhang, H. Shen, J. Wang, J. Li, C. Wu, W. Wang, Y. Cao, S. Zhou, Q. Zhang, and H. Zhang, *Small* 2022, **18**, 2201306.
- (23) F. Kong, and M. Wang, *ACS Appl. Energy Mater.* 2021, **4**, 1182–1188.
- (24) J. Zhang, P. Yu, G. Zeng, F. Bao, Y. Yuan, and H. Huang, *J. Mater. Chem. A*, 2021, **9**, 9685-9691.
- (25) B. Zhang, H. Fu, and T. Mu, *Green Chem.*, 2022, **24**, 877-884.
